# Supplementary material for: Development of indicators to assess medication safety – An experience from a resource limited healthcare setting
Source: Research Square preprint supplement (doi:10.21203/rs.3.rs-6910993/v1), 2025-07-17
Supplement: Supplementary file 1 [file 4b8d15ebf5ab160460ac36a1.docx]

**Appendix 01
Summary of the ratings obtained from rating round 01**

| **No** | **Indicator** | **Panel median for each parameter in the rating round 01** | | | | | | **Outcome** | **Core/ Supplementary indicator** | |
| --- | --- | --- | --- | --- | --- | --- | --- | --- | --- | --- |
| Appropriateness | Relevance | Measurability and Feasibility | Clarity | Usefulness | Comparability | Core indicator | Supplementary indicator |
| **1** | **Indicators for Medication Safety in Regulations of Medicines** | | | | | | | | | |
| 1.1 | Percentage of unregistered medicines available in the country. | 9 | 8 | 8 | 9 | 8 | 8 | Appropriate | 11 | 4 |
| 1.2 | Percentage of registered medicines where  registration has been cancelled/suspended by the regulatory authority annually | 7 | 7 | 7 | 7 | 7 | 6 | Uncertain | 7 | 7 |
| 1.3 | Percentage of pharmacies without registration according to NMRA. | 8 | 8 | 7 | 7 | 7 | 7 | Appropriate | 7 | 4 |
| 1.4 | Percentage of counterfeit products reported to the regulatory authority | 9 | 9 | 5 | 7 | 8 | 7 | Uncertain | 6 | 5 |
| 1.5 | Number of ADRs reports reported to National ADR reporting System annually per 100,000 population. | 9 | 8 | 7 | 7 | 8 | 7 | Appropriate | 13 | 2 |
| 1.6 | Percentage of community pharmacies without the physical presence of a registered pharmacist. | 9 | 8 | 7 | 8 | 8 | 6 | Uncertain | 9 | 6 |
| **1.7** | Percentage of direct to consume advertisements of medicines, which are  not approved by the Advertisement Evaluation Subcommittee. | 8 | 7 | 6 | 6 | 6 | 5 | Uncertain | 4 | 9 |
| 1.8 | Percentages of medicines not complying with the labeling requirements specified by the Regulatory Authority. | 8 | 8 | 6 | 6 | 7 | 6.5 | Uncertain | 6 | 8 |
| 1.9 | Percentages of selected medicines accompanied by product information  leaflet which identical to the original Summery of product characteristics (SPC). | 8 | 8 | 7 | 7 | 7 | 6 | Uncertain | 7 | 8 |
| 1.10 | Percentage of selected medicines accompanied by an information leaflet  for patients according to the requirements of the regulatory authority. | 9 | 8 | 6 | 8 | 7 | 7 | Uncertain | 7 | 7 |
| 1.11 | Percentage of products having at least one batch withheld done within one year due to a quality failure. | 7.5 | 8 | 7 | 7.5 | 7.5 | 6.5 | Uncertain | 8 | 6 |
| 1.12 | Percentage of essential medicines with only one registered supplier. | 6.5 | 6.5 | 8 | 7.5 | 6.5 | 6 | Uncertain | 4 | 10 |
| 1.13 | Percentage of medicines registered with more than 20 different suppliers. | 6 | 6 | 7 | 6 | 6 | 6 | Uncertain | 2 | 11 |
| 1.14 | Percentage of new chemical entities covered by post marketing surveillance  within a year, out of total number of new chemical entities registered by that  year. | 8 | 8 | 6 | 6 | 7.5 | 6 | Uncertain | 6 | 5 |
| 1.15 | Percentage of pharmacies subjected to inspection by FDIs within a month. | 8 | 8 | 7 | 7 | 7 | 6 | Uncertain | 7 | 6 |
| 1.16 | Percentage of complaints on medicines which are investigated and found to have a quality failure. | 9 | 9 | 7 | 7 | 8 | 8 | Appropriate | 12 | 2 |
| 1.17 | Percentage of random samples of medicines collected and found to have quality failures. | 9 | 9 | 8 | 8 | 8 | 8 | Appropriate | 13 | 1 |
| 1.18 | Percentage of Look-Alike and Sound-Alike  brands/ products that are recognized by NMRA and registration not granted or revisions recommended. | 8 | 7 | 6 | 7 | 7 | 7 | Uncertain | 7 | 7 |
| 1.19 | Percentage of sound alike medicines available. | 8.5 | 8 | 6 | 8 | 8.5 | 7.5 | Uncertain | 8 | 6 |
| 1.20 | Percentage of Look-Alike medicines available. | 8 | 8 | 6 | 7 | 8 | 7.5 | Uncertain | 7 | 7 |
| 1.21 | Availability of a National Medication Safety Action Plan addressing safety aspects during registration. | 8 | 8 | 7 | 7 | 8 | 8 | Appropriate | 8 | 6 |
| 1.22 | Implementation of aspects pertaining to registration of medicines in the medication safety action plan. | 8 | 7 | 7 | 7 | 7 | 7 | Appropriate | 7 | 5 |
| 1.23 | Availability of policies/ recommendations to address using medicines in polypharmacy. | 9 | 8 | 7 | 8 | 8 | 7 | Appropriate | 8 | 6 |
| 1.24 | Implementation of policies to address using medicines in polypharmacy | 9 | 8 | 7 | 8 | 8 | 8 | Appropriate | 8 | 5 |
| 1.25 | Availability of standard dossier format for the regulatory authority. | 8 | 7 | 8 | 8 | 8 | 6 | Appropriate | 3 | 10 |
| 1.26 | Availability of a list of high risk medications to be more careful during registration. | 8 | 8 | 7 | 7 | 8 | 7 | Appropriate | 9 | 5 |
| 1.27 | Availability of a List of Look-Alike and Sound-Alike medications to be careful  during registration of brands. | 8 | 8 | 8 | 8 | 8 | 7 | Appropriate | 4 | 7 |
| **2** | **Indicators for Medication Safety in Procurement of medicines** | | | | | | | | | |
| 2.1 | Percentage of medicines purchased through Waiver of registration. | 8 | 8 | 8 | 8 | 7.5 | 7 | Appropriate | 9 | 5 |
| 2.2 | Percentage availability of essential medicines  selected based on accepted methodology. | 8 | 8 | 8 | 8 | 8 | 7 | Appropriate | 7 | 7 |
| 2.3 | Percentage availability of the medicines with narrow therapeutic window. | 6 | 6 | 8 | 7 | 7 | 7 | Uncertain | 5 | 8 |
| 2.4 | Average percentage of medicines purchased close to expiry date. | 8.5 | 8.5 | 8 | 7.5 | 8 | 8 | Appropriate | 12 | 3 |
| 2.5 | Percentage of vaccines purchased with the lapses of cold chain management during pre-shipment and delivery. | 9 | 8 | 8 | 8 | 8 | 7.5 | Appropriate | 13 | 2 |
| 2.6 | Percentage of medicines (except bio similars) that have undergone established procedure of sample testing prior to purchasing. | 9 | 9 | 9 | 8 | 8 | 7 | Appropriate | 13 | 2 |
| **3** | **Indicators for Medication Safety in Storage & Distribution of Medicines** | | | | | | | | | |
| 3.1 | Percentage of Look-Alike and Sound-Alike (LASA) medicines relevant to the selected setting, in which those are not clearly  differentiated in packaging and labeling or not  separately stored. (eg. by Tall man lettering). | 9 | 9 | 7 | 7 | 8 | 8 | Appropriate | 11 | 3 |
| 3.2 | Percentage of high risk/ alert medicines not clearly identified as a high risk medicine in their labels. | 9 | 8 | 8 | 8 | 8 | 8 | Appropriate | 12 | 2 |
| 3.3 | Percentage of expired, recalled, damaged or spoilt medicines not stored separately. | 8.5 | 8 | 7 | 7.5 | 8 | 8 | Appropriate | 11 | 3 |
| 3.4 | Percentage of medicines stored directly on the floor. | 8 | 8 | 7 | 7 | 7 | 7 | Appropriate | 5 | 9 |
| 3.5 | Percentage of repackaged medicinal products that comply with all the labeling requirements. | 8.5 | 8 | 7 | 7.5 | 8 | 8 | Appropriate | 7 | 5 |
| 3.6 | Percentage of extemporaneous medicinal  products prepared in bulk in the particular setting that do not comply with all the labeling requirements. | 8 | 8 | 7 | 7 | 7 | 7 | Appropriate | 6 | 8 |
| 3.7 | Percentage of stores with complete temperature monitoring records in cold storage. | 9 | 9 | 7.5 | 8 | 9 | 8 | Appropriate | 12 | 1 |
| 3.8 | Percentage of schedule III drugs (Dangerous drugs) which are not kept under a  lock and key. | 8 | 8 | 8 | 9 | 8 | 8 | Appropriate | 9 | 6 |
| 3.9 | Percentage of settings where oral and parenteral preparations are not stored  separately. | 8 | 6 | 7 | 8 | 6 | 7 | Uncertain | 5 | 10 |
| 3.10 | Percentage of staff involved in medication use, who are not aware of the list of LASA  medicines and of high risk medicines available at the stores. | 9 | 8.5 | 8 | 8 | 8 | 7.5 | Appropriate | 10 | 4 |
| 3.11 | Percentage of settings without an identified LASA medicines list. | 8 | 8 | 7 | 7 | 8 | 8 | Appropriate | 6 | 7 |
| 3.12 | Percentage of settings without an identified high alert medicines list. | 8 | 8 | 8 | 8 | 8 | 8 | Appropriate | 6 | 7 |
| 3.13 | Percentage storage area covered by air conditioners. | 9 | 9 | 8 | 8 | 8.5 | 8 | Appropriate | 7 | 6 |
| 3.14 | Percentage of cold rooms / refrigerators available with both alternative power  system & temperature / humidity detector. | 9 | 8 | 8 | 8 | 8 | 8 | Appropriate | 11 | 2 |
| 3.15 | Percentage of stores with humidity monitoring device. | 9 | 8.5 | 8 | 8 | 8 | 8 | Appropriate | 8 | 5 |
| 3.16 | Percentage of drug transporting vehicles with temperature monitoring devices. | 9 | 9 | 8.5 | 8 | 8 | 8 | Appropriate | 11 | 3 |
| **4** | **Indicators for Medication Safety in Prescribing** | | | | | | | | | |
| 4.1 | Percentage of medicines indicating the generic name | 8 | 8 | 8 | 9 | 8.5 | 8 | Appropriate | 12 | 4 |
| 4.2 | Percentage of prescriptions with all the required patient information. | 9 | 9 | 8.5 | 9 | 8.5 | 9 | Appropriate | 14 | 1 |
| 4.3 | Percentage of prescriptions with all the required prescriber’s information. | 9 | 9 | 9 | 8.5 | 9 | 8.5 | Appropriate | 12 | 2 |
| 4.4 | Percentage of prescriptions with all the required information of prescribed medicines. | 9 | 9 | 9 | 9 | 9 | 9 | Appropriate | 13 | 2 |
| 4.5 | Percentage of prescriptions with erroneous information of prescribed medicines  (Name, strength, frequency and number of units and duration). | 9 | 9 | 9 | 9 | 9 | 9 | Appropriate | 10 | 4 |
| 4.6 | Percentage of prescriptions with the duplication of drugs in the same class or inappropriate combinations. | 9 | 9 | 8 | 8 | 9 | 9 | Appropriate | 10 | 5 |
| 4.7 | Percentage of prescriptions with two or more medicines prone to cause clinically harmful drug-drug interactions. | 9 | 9 | 8 | 9 | 9 | 8 | Appropriate | 10 | 5 |
| 4.8 | Percentage of prescriptions having more than 4 drugs. | 6 | 5 | 8 | 8 | 6 | 8 | Uncertain | 7 | 6 |
| 4.9 | Percentage of prescriptions with at least one high risk / alert medicine from a list of high risk/ alert medicines applicable to the setting. | 8 | 8 | 8 | 7 | 7 | 8 | Appropriate | 9 | 6 |
| 4.10 | Percentage of prescriptions with at least one error prone abbreviation from a list of error prone abbreviations applicable to the setting. | 9 | 9 | 8 | 8 | 9 | 8 | Appropriate | 10 | 5 |
| 4.11 | Percentage of prescriptions in which all the details are not legible. | 9 | 9 | 7.5 | 6 | 8 | 8 | Uncertain | 11 | 5 |
| 4.12 | Percentage of prescriptions where dose calculations required. | 7.5 | 7.5 | 7 | 7.5 | 8 | 8 | Appropriate | 8 | 8 |
| 4.13 | Percentage of prescriptions where there are unintended essential omissions. | 8 | 8 | 7 | 6.5 | 8 | 8 | Appropriate | 5 | 11 |
| 4.14 | Percentage of prescriptions where therapeutic monitoring is required. | 8 | 8 | 7 | 7 | 7.5 | 8 | Appropriate | 8 | 8 |
| 4.15 | Percentage of prescriptions with at least one look alike sound alike (LASA) medicine from a list of LASA medicines applicable to the setting. | 8 | 8 | 8 | 7 | 8 | 8 | Appropriate | 8 | 8 |
| 4.16 | Percentage of prescriptions where contraindicated (including allergies) medicines are prescribed. | 9 | 9 | 7.5 | 8 | 8.5 | 8 | Appropriate | 11 | 5 |
| 4.17 | Percentage of instances where patients regular  medicines are not included into the drug chart at admission. | 9 | 9 | 8 | 8.5 | 8.5 | 8 | Appropriate | 11 | 5 |
| 4.18 | Percentage of instances where patients regular  medicines are not included into the prescription at discharge. | 8.5 | 8.5 | 8 | 8 | 8 | 8 | Appropriate | 9 | 6 |
| **5** | **Indicators for Medication Safety in transcribing** | | | | | | | | | |
| 5.1 | Percentage of verbal drug orders received. | 8 | 7.5 | 5.5 | 6 | 7 | 6.5 | Uncertain | 7 | 8 |
| 5.2 | Percentage of prescriptions clarified from the prescriber. | 8 | 8 | 7 | 7 | 7.5 | 8 | Appropriate | 8 | 6 |
| 5.3 | Percentage of prescriptions with calculations not double checked by another health care professional. | 7.5 | 7.5 | 6 | 6 | 7 | 7 | Uncertain | 4 | 12 |
| 5.4 | Percentage of settings without an established list of error prone abbreviations. | 8 | 8 | 8 | 8 | 8 | 8 | Appropriate | 6 | 9 |
| 5.5 | Percentage of settings without an established  policy for expressing error prone dosing regimens of medicines in hospital level. | 7.5 | 7.5 | 7.5 | 7 | 7.5 | 7 | Appropriate | 9 | 6 |
| 5.6 | Percentage of settings without the availability of the electronic prescribing facility | 7 | 7 | 7.5 | 8 | 7 | 7.5 | Appropriate | 8 | 7 |
| 5.7 | Percentage of drug charts with transcribing errors | 8 | 8 | 8 | 8 | 8 | 8 | Appropriate | 11 | 4 |
| 5.8 | Percentage of drug labels with transcribing errors | 9 | 9 | 8.5 | 9 | 9 | 9 | Appropriate | 11 | 4 |
| **6** | **Indicators for Medication Safety in preparation and dispensing of medicines** | | | | | | | | | |
| 6.1 | Percentage of registered pharmacists involved in dispensing medicines | 8.5 | 8 | 8.5 | 8.5 | 8 | 8 | Appropriate | 14 | 2 |
| 6.2 | Percentage of pharmacists whose average dispensing time is lower than 3 minutes (WHO recommended value) | 7.5 | 6 | 6 | 6 | 6 | 6.5 | Uncertain | 8 | 8 |
| 6.3 | Percentage of patients whose name and age is not verified prior to dispensing the medicines. | 9 | 9 | 8 | 8 | 8 | 8 | Appropriate | 13 | 3 |
| 6.4 | Percentage of settings not conducting an annual assessment on sterile reconstitution of parenteral medications where it is indicated. | 8 | 7 | 7 | 7 | 7 | 7 | Appropriate | 5 | 10 |
| 6.5 | Percentage of patients received at least one medicine without proper labeling. (include patient name, drug name, strength, quantity, dosage instructions) | 9 | 9 | 8 | 8 | 8.5 | 8 | Appropriate | 16 | 0 |
| 6.6 | Percentage of patients received at least one  medicine without proper packaging | 8 | 8 | 7 | 7 | 8 | 8 | Appropriate | 12 | 4 |
| 6.7 | Percentage of patients not asked about allergic conditions. | 9 | 9 | 8 | 8 | 8 | 8 | Appropriate | 9 | 5 |
| 6.8 | Percentage of patients not advised on food interaction with drugs where relevant. | 7 | 7 | 6 | 7 | 7 | 7 | Uncertain | 5 | 9 |
| 6.9 | Percentage of prescriptions for high alert medications that are not double checked and documented by pharmacist. | 8 | 8 | 7 | 8 | 8 | 8 | Appropriate | 7 | 7 |
| 6.10 | Percentage of pharmacists involving compounding and dispensing, who are  not maintaining proper personal hygiene. (Washing hands, wearing masks, hand gloves, hair caps etc.) | 8 | 8 | 7 | 7 | 8 | 8 | Appropriate | 8 | 7 |
| 6.11 | Percentage of instances where dispensing  prescription-only medicines without a proper prescription (e.g.: Outdated, No prescriber’s signature and seal) | 9 | 9 | 8 | 8 | 8 | 8 | Appropriate | 12 | 4 |
| 6.12 | Percentage of patients not aware of key information (Name, dose, indication, frequency and other special instructions) of the medicines they received. | 8 | 8 | 7 | 7.5 | 8 | 8 | Appropriate | 11 | 5 |
| 6.13 | Percentage of dispensed prescriptions found to have any discrepancy with five rights: Right drug, Right dose, Right route of  administration, Right time and Right patient. | 9 | 9 | 7 | 6 | 9 | 9 | Uncertain | 11 | 5 |
| 6.14 | Percentage of patients who are not aware of the common and important adverse effects of his medicines and what to do in such situation. | 8.5 | 8 | 7.5 | 8 | 8 | 8 | Appropriate | 13 | 3 |
| 6.15 | Percentage of error in the prescription passed to the patient without detection. | 9 | 9 | 8.5 | 9 | 8 | 8 | Appropriate | 8 | 6 |
| 6.16 | Percentage of instances where hospital pharmacist contacted patient due to a medication error or quality failure of a medicine, within a defined time period. | 8 | 8 | 7 | 8 | 8 | 7.5 | Appropriate | 7 | 7 |
| 6.17 | Percentage of settings without having a separate area for patient counseling. | 8 | 8 | 7.5 | 7.5 | 8 | 7.5 | Appropriate | 9 | 6 |
| 6.18 | Percentage of pharmacists not using tablet counting devices to count the tablets. | 7 | 7 | 7.5 | 7.5 | 7.5 | 7.5 | Appropriate | 7 | 8 |
| 6.19 | Percentage of settings not having a guideline to avoid misuse of medicines (e.g. Opioids, Antibiotics) | 8 | 8 | 8 | 8 | 8 | 8 | Appropriate | 9 | 6 |
| **7** | **Indicators for Medication Safety in administration of medicines**  **(A) Administration of medicines to inward patients** | | | | | | | | | |
| 7.1 | Percentage of patients, at least one erroneous administration of medicines was observed. | 8.5 | 9 | 7 | 8 | 8 | 8 | Appropriate | 10 | 6 |
| 7.2 | Percentage of patients, where at least 2 identifiers of the patient were not used to verify patient identity during administration of medicines. | 8.5 | 8 | 6 | 8 | 8 | 7.5 | Uncertain | 11 | 3 |
| 7.3 | Percentage of patients, for whom each medication dose administered is not documented promptly in medication chart. | 9 | 9 | 7.5 | 8 | 8 | 8 | Appropriate | 14 | 1 |
| 7.4 | Percentage of patients with high alert medications where the observer noted that there was a double checking for five rights. | 9 | 8.5 | 8 | 8 | 8 | 8.5 | Appropriate | 13 | 2 |
| 7.5 | Percentage of high alert medicines which are not labeled as high alert to differentiate from other medications. | 8 | 8 | 8 | 8 | 8 | 8 | Appropriate | 11 | 4 |
| 7.6 | Percentage of settings where high risk medicines have been kept in patient care areas without proper labeling (e.g.: KCl, heparin  vials together with sterile water for injections as flush solutions) | 8 | 8 | 8 | 8 | 8 | 8 | Appropriate | 9 | 7 |
| 7.7 | Percentage of patients not advised on possible serious adverse effects that they may experience where relevant. | 8 | 8 | 7 | 7 | 8 | 8 | Appropriate | 10 | 5 |
| 7.8 | Percentage of instances where established policies / operating procedures / technologies (e.g.: computerized decision support systems, barcode readers, smart infusion pumps) were used to help nurses to safely administer medicines. | 8 | 8 | 8 | 8 | 8 | 8 | Appropriate | 4 | 10 |
| 7.9 | Percentage of instances where eye or ear drops in same container is used for more than one patient. | 8 | 8 | 7 | 8 | 8 | 8 | Appropriate | 8 | 6 |
| 7.10 | Percentage of instances where a single use medical device is used more than once to administer drugs. | 9 | 9 | 8 | 8 | 8 | 8 | Appropriate | 8 | 6 |
| 7.11 | Percentage of reconstituted IV solutions (e.g.:  chemotherapy, pediatric infusions) without  complying with the labeling requirements. | 9 | 9 | 8 | 8 | 8 | 8 | Appropriate | 10 | 5 |
| 7.12 | Percentage of instances where errors in reconstitutions have been occurred. | 8 | 8 | 6 | 7 | 8 | 8 | Uncertain | 6 | 9 |
| 7.13 | Percentage of instances where errors in  calculations have been made in the observed  number of administrations involving calculations. | 9 | 8 | 6 | 7 | 8 | 8 | Uncertain | 9 | 6 |
| 7.14 | Percentage of instances where errors made in the administrations involving IV lines in ICU settings. | 8 | 8 | 7 | 7 | 8 | 7.5 | Appropriate | 7 | 8 |
|  | **(B) Administration of medicines by patients at home** | | | | | | | | | |
| 7.15 | Percentage of patients who did not store medicines at home under recommended conditions. | 8 | 8 | 6 | 7 | 7 | 7 | Uncertain | 8 | 7 |
| 7.16 | Percentage of patients whose medications were stored at home unsafely (with access to children, not under lock and key, where medicines can be mistaken for one another). | 8 | 8 | 6 | 6 | 7 | 7 | Uncertain | 6 | 7 |
| 7.17 | Percentages of out-patients in a representative sample, whose medication were not properly separated from other medications when storing. | 7 | 8 | 6 | 6 | 6 | 6 | Uncertain | 6 | 8 |
| 7.18 | Percentage of patients who admitted at least one erroneous administration of medicines, within a defined time period. | 9 | 9 | 8 | 8 | 8 | 8 | Appropriate | 8 | 6 |
| 7.19 | Percentage of patients who admitted self- administering antibiotics in a representative sample. | 9 | 9 | 6 | 7 | 8 | 8 | Appropriate | 9 | 5 |
| **8** | **Indicators for Medication Safety in monitoring of medicines** | | | | | | | | | |
| 8.1 | Percentage of medication errors not reported to Quality & safety unit within a defined time period. | 8 | 8 | 6 | 8 | 8 | 8 | Uncertain | 12 | 3 |
| 8.2 | Percentage of instances where medication errors were identified and no preventive action taken. | 8 | 8 | 7 | 8 | 8 | 8 | Appropriate | 12 | 2 |
| 8.3 | Percentage of adverse drug reactions reported to NMRA. | 8.5 | 8.5 | 7 | 8 | 8 | 8 | Appropriate | 8 | 6 |
| 8.4 | Percentage of medication error / ADR related  admissions reported to the hospital. | 8 | 8 | 7.5 | 8 | 8 | 8 | Appropriate | 10 | 5 |
| 8.5 | Percentage of patients on long term medicines who had not a drug regimen review within a defined period . | 8 | 8 | 7.5 | 8 | 9 | 8 | Appropriate | 9 | 6 |
| 8.6 | Percentage of patients on lithium, without recommended monitoring. | 8.5 | 8.5 | 8.5 | 9 | 9 | 8.5 | Appropriate | 11 | 5 |
| 8.7 | Percentage of elderly patients on thiazide or  loop diuretic without recommended monitoring | 7.5 | 7.5 | 7 | 8 | 7.5 | 7.5 | Appropriate | 9 | 7 |
| 8.8 | Percentage of patients on warfarin, without  Recommended monitoring. | 9 | 9 | 8.5 | 9 | 9 | 9 | Appropriate | 10 | 5 |
| 8.9 | Percentage of patients on amiodarone, without recommended monitoring. | 8 | 8 | 7.5 | 8 | 8 | 8 | Appropriate | 8 | 8 |
| 8.10 | Percentage of patients on ACE inhibitor or angiotensin II receptor antagonist, without recommended monitoring. | 8 | 8 | 8 | 8 | 8 | 8 | Appropriate | 8 | 8 |
| 8.11 | Percentage of patients on methotrexate weekly, without recommended monitoring. | 9 | 9 | 8 | 9 | 9 | 9 | Appropriate | 11 | 4 |
| 8.12 | Percentage of patients with renal impairment  and prescribed an aminoglycoside without  dose frequency adjustment. | 8.5 | 8 | 7 | 8 | 8 | 8 | Appropriate | 10 | 6 |
| 8.13 | Percentage of patients with estimated glomerular filtration rate <30 ml min-1 (1.73 m)-2 and prescribed metformin. | 8.5 | 8.5 | 8 | 8 | 8 | 8 | Appropriate | 11 | 5 |
