# Supplementary material for: Development of indicators to assess medication safety – An experience from a resource limited healthcare setting
Source: Research Square preprint supplement (doi:10.21203/rs.3.rs-6910993/v1), 2025-07-17
Supplement: Supplementary file 2 [file 53c6ba0591265cde10b6ba1f.docx]

**Appendix 02**

**Summary of the ratings obtained from rating round 02 and the meeting**

| **No.** | **Initial Indicator** | | **Core/ Supplementary indicator** | **Panel median for each parameter in the rating round 02** | | | | | | | **Overall consensus** | **Finalized Indicator** |
| --- | --- | --- | --- | --- | --- | --- | --- | --- | --- | --- | --- | --- |
|  |  | |  | Appropriateness | Relevance | Measurability and Feasibility | Clarity | Usefulness | Comparability | |
| 1 | Indicators for Medication Safety in Regulations of Medicines | | | | | | | | | | | |
| 1.1 | Percentage of unregistered medicines available in the country. | | Core indicator | 9 | 8 | 8 | 9 | 9 | 8 | | Combined indicator 1.1 with 1.2. | Percentage of unregistered medicines in a sample of medicines evaluated. |
| 1.2 | Percentage of registered medicines where registration has been cancelled/suspended by the regulatory authority annually | | Uncertain | 7 | 7 | 7 | 7 | 6 | 6 | |  |  |
| 1.3 | Percentage of pharmacies without registration according to NMRA. | | Core indicator | 8 | 8 | 7 | 7 | 7 | 7 | | Included | Percentage of pharmacies not registered with the regulatory authority |
| 1.4 | Percentage of counterfeit products reported to the regulatory authority | | Core indicator | 9 | 9 | 5 | 7 | 8 | 7 | | Excluded |  |
| 1.5 | Number of ADRs reports reported to National ADR reporting System annually per 100,000 population. | | Core indicator | 9 | 8 | 7 | 7 | 8 | 7 | | Included | Number of ADRs reported to National ADR reporting System annually per 100,000 population. |
| 1.6 | Percentage of community pharmacies without the physical presence of a registered pharmacist. | | Core indicator | 9 | 8 | 7 | 8 | 8 | 7 | | Included | Percentage of community pharmacies without the physical presence of a registered pharmacist. |
| **1.7** | Percentage of direct to consume advertisements of medicines, which are not approved by the Advertisement Evaluation Subcommittee. | | Supplementary indicator | 8 | 7 | 6 | 6 | 6 | 5 | | Excluded |  |
| 1.8 | Percentages of medicines not complying with the labeling requirements specified by the Regulatory Authority. | | Supplementary indicator | 8 | 8 | 7 | 7 | 7 | 8 | | Included | Percentages of medicines not complying with the labeling requirements specified by the Regulatory Authority. |
| 1.9 | Percentages of selected medicines accompanied by product information  leaflet which identical to the original Summery of product characteristics (SPC). | | Supplementary indicator | 8 | 8 | 7 | 7 | 7 | 7 | | Included | Percentage of medicines not accompanied by product information leaflet which is in accordance to the original Summery of Product Characteristics (SPC). |
| 1.10 | Percentage of selected medicines accompanied by an information leaflet  for patients according to the requirements of the regulatory authority. | | Core indicator | 9 | 8 | 7 | 8 | 8 | 8 | | Included | Percentage of medicines not accompanied by an information leaflet for patients according to the requirements of the regulatory authority. |
| 1.11 | Percentage of products having at least one batch withheld done within one year due to a quality failure. | | Core indicator | 8 | 8 | 7 | 8 | 8 | 7 | | Excluded |  |
| 1.12 | Percentage of essential medicines with only one registered supplier. | | Supplementary indicator | 7 | 7.5 | 8 | 7.5 | 7 | 7 | | Included | Percentage of essential medicines with only one registered supplier. |
| 1.13 | Percentage of medicines registered with more than 20 different suppliers. | | Supplementary indicator | 7 | 7 | 8 | 7 | 7 | 7 | | Included | Percentage of medicines registered with more than 20 different suppliers. |
| 1.14 | Percentage of new chemical entities covered by post marketing surveillance within a year, out of total number of new chemical entities registered by that year. | | Core indicator | 9 | 8 | 6 | 6 | 7.5 | 6 | | Excluded |  |
| 1.15 | Percentage of pharmacies subjected to inspection by FDIs within a month. | | Core indicator | 8 | 8 | 6 | 7 | 7 | 6 | | Excluded |  |
| 1.16 | Percentage of complaints on medicines which are investigated and found to have a quality failure. | | Core indicator | 9 | 9 | 7 | 7 | 8 | 8 | | Revised | Percentage of quality failed medicines. |
| 1.17 | Percentage of random samples of medicines collected and found to have quality failures. | | Core indicator | 9 | 9 | 8 | 8 | 8 | 8 | | Included | Percentage of random samples of medicines collected by the regulatory authority and found have quality failures. |
| 1.18 | Percentage of Look-Alike and Sound-Alike  brands/ products that are recognized by NMRA and registration not granted or revisions recommended. | | Uncertain | 8 | 7 | 6 | 7 | 7 | 7 | | Excluded |  |
| 1.19 | Percentage of sound alike medicines available. | | Core indicator | 9 | 8 | 8 | 8 | 9 | 7.5 | | Combined indicator 1.19 with 1.20. | Percentage of Look-alike, Sound-alike (LASA) medicines identified by the regulatory authority at registration annually. |
| 1.20 | Percentage of Look-Alike medicines available. | | Core indicator | 8 | 8 | 7 | 7 | 8 | 8 | |  |  |
| 1.21 | Availability of a National Medication Safety Action Plan addressing safety aspects during registration. | | Core indicator | 8 | 8 | 7 | 7 | 8 | 8 | | Revised | Availability of National Medication safety action plan.  To be answered as Yes/No |
| 1.22 | Implementation of aspects pertaining to registration of medicines in the medication safety action plan. | | Core indicator | 8 | 7 | 6 | 7 | 7 | 7 | | Excluded |  |
| 1.23 | Availability of policies/ recommendations to address using medicines in polypharmacy. | | Core indicator | 9 | 8 | 6 | 8 | 8 | 7 | | Excluded |  |
| 1.24 | Implementation of policies to address using medicines in polypharmacy | | Core indicator | 9 | 8 | 6 | 8 | 8 | 8 | | Excluded |  |
| 1.25 | Availability of standard dossier format for the regulatory authority. | | Supplementary indicator | 8 | 7 | 8 | 8 | 8 | 7 | | Re-worded | Availability of internationally accepted dossier format for the regulatory authority. To be answered as Yes/No |
| 1.26 | Availability of a list of high risk medications to be more careful during registration. | | Core indicator | 8 | 8 | 7 | 7 | 8 | 7 | | Revised | Availability of a nationally developed list of high risk-medicines that is considered during registration of medicines.  To be answered as Yes/No |
| 1.27 | Availability of a List of Look-Alike and Sound-Alike medications to be careful  during registration of brands. | | Supplementary indicator | 8 | 8 | 8 | 8 | 8 | 7 | | Included | Availability of a list of look-alike and sound-alike medications that is considered during registration of medicines  To be answered as Yes/No |
| **2** | **Indicators for Medication Safety in Procurement of medicines** | | | | | | | | | | | |
| 2.1 | Percentage of medicines purchased through Waiver of registration. | | Core indicator | 8 | 8 | 8 | 8 | 8 | 7 | | Split into two indicators | Percentage of medicines purchased outside the approved formulary list of medicines for the selected setting.  Not using a mechanism to ensure that only registered medicines are procured.  To be answered as Yes/No |
| 2.2 | Percentage availability of essential medicines  selected based on accepted methodology. | | Supplementary indicator | 8 | 8 | 8 | 8 | 8 | 7 | | Re-worded | Percentage of essential medicines not available in the setting. |
| 2.3 | Percentage availability of the medicines with narrow therapeutic window. | | Supplementary indicator | 6 | 6 | 8 | 7 | 6 | 7 | | Excluded |  |
| 2.4 | Average percentage of medicines purchased close to expiry date. | | Core indicator | 9 | 9 | 8 | 7.5 | 8 | 8 | | Revised | Average percentage of medicines with the expiry date less than one year at procurement. |
| 2.5 | Percentage of vaccines purchased with the lapses of cold chain management during pre-shipment and delivery. | | Core indicator | 9 | 8 | 8 | 8 | 8 | 8 | | Revised | Unavailability of a procedure to ensure the cold chain maintenance during pre-shipment and delivery.  To be answered as Yes/No |
| 2.6 | Percentage of medicines (except bio similars) that have undergone established procedure of sample testing prior to purchasing. | | Core indicator | 9 | 9 | 9 | 8 | 8 | 7 | | Included | Percentage of medicines (except bio similar medicines) that has not undergone sample testing prior to purchasing. |
| **3** | **Indicators for Medication Safety in Storage & Distribution of Medicines** | | | | | | | | | | | |
| 3.1 | Percentage of Look-Alike and Sound-Alike (LASA) medicines relevant to the selected setting, in which those are not clearly  differentiated in packaging and labeling or not  separately stored. (eg. by Tall man lettering). | | Core indicator | 9 | 9 | 7 | 7 | 8 | 8 | | Re-worded | Percentage of look-alike and sound-alike (LASA) medicines which are not clearly identified in labeling. |
| 3.2 | Percentage of high risk/ alert medicines not clearly identified as a high risk medicine in their labels. | | Core indicator | 9 | 8 | 8 | 8 | 8 | 8 | | Included | Percentage of high risk/alert medicines which are not clearly identified as a high-risk medicine in their labels. |
| 3.3 | Percentage of expired, recalled, damaged or spoilt medicines not stored separately. | | Core indicator | 8.5 | 8 | 7 | 8 | 8 | 8 | | Included | Percentage of expired, recalled, damaged or spoilt medicines not stored separately. |
| 3.4 | Percentage of medicines stored directly on the floor. | | Supplementary indicator | 8 | 8 | 7 | 8 | 7 | 7 | | Included | Percentage of medicines which are stored directly on the floor. |
| 3.5 | Percentage of repackaged medicinal products that comply with all the labeling requirements. | | Core indicator | 8.5 | 8 | 7 | 8 | 8 | 8 | | Combined indicator 3.5 with 3.6. | Percentage of prepackaged medicines, including extemporaneous products, not complying with the labeling requirements. |
| 3.6 | Percentage of extemporaneous medicinal  products prepared in bulk in the particular setting that do not comply with all the labeling requirements. | | Supplementary indicator | 8 | 8 | 7 | 7 | 7 | 7 | |  | Percentage of extemporaneous medicinal products prepared in bulk in the particular setting that comply with all the labeling requirements. |
| 3.7 | Percentage of stores with complete temperature monitoring records in cold storage. | | Core indicator | 9 | 9 | 8 | 8.5 | 9 | 8 | | Reworded | Percentage of settings without complete temperature monitoring logs for cold storage. |
| 3.8 | Percentage of schedule III drugs (Dangerous drugs) which are not kept under a  lock and key. | | Core indicator | 8 | 8 | 8 | 9 | 8 | 8 | | Reworded | Percentage of settings where the schedule III drugs (Dangerous drugs) are not stored under a lock and key. |
| 3.9 | Percentage of settings where oral and parenteral preparations are not stored  separately. | | Supplementary indicator | 8 | 6 | 7 | 8 | 6 | 7 | | Excluded |  |
| 3.10 | Percentage of staff involved in medication use, who are not aware of the list of LASA  medicines and of high risk medicines available at the stores. | | Core indicator | 9 | 9 | 8 | 8 | 8 | 7.5 | | Re-worded | Percentage of staff involved in medication use, who are aware of the list of LASA medicines and of high risk medicines available at the stores. |
| 3.11 | Percentage of settings without an identified LASA medicines list. | | Supplementary indicator | 8 | 8 | 7 | 7 | 8 | 8 | | Included | Percentage of settings without an identified LASA medicines list. |
| 3.12 | Percentage of settings without an identified high alert medicines list. | | Supplementary indicator | 8 | 8 | 8 | 8 | 8 | 8 | | Included | Percentage of settings without an identified high alert medicines list. |
| 3.13 | Percentage storage area covered by air conditioners. | | Core indicator | 9 | 9 | 8 | 8 | 8.5 | 8 | | Revised | Percentage of settings where all the storage areas are not covered by air conditioners to maintain the temperature at 20°C to 25°C. |
| 3.14 | Percentage of cold rooms / refrigerators available with both alternative power  system & temperature / humidity detector. | | Core indicator | 9 | 8 | 8 | 8 | 9 | 8 | | Revised | Percentage of settings where the cold rooms / refrigerators are not equipped with an alternative power system. |
| 3.15 | Percentage of stores with humidity monitoring device. | | Core indicator | 9 | 8.5 | 8 | 8 | 8 | 8 | | Revised | Percentage of settings without having devices to monitor temperature and relative humidity. |
| 3.16 | Percentage of drug transporting vehicles with temperature monitoring devices. | | Core indicator | 9 | 9 | 9 | 8 | 8 | 8 | | Re-worded | Percentage of medicines transporting vehicles not equipped with temperature monitoring devices. |
| **4** | **Indicators for Medication Safety in Prescribing** | | | | | | | | | | | |
| 4.1 | Percentage of medicines indicating the generic name | | Core indicator | 8 | 8 | 8 | 9 | 8.5 | 8 | | Re-worded | Percentage of medicines prescribed without indicating the generic name. |
| 4.2 | Percentage of prescriptions with all the required patient information. | | Core indicator | 9 | 9 | 8.5 | 9 | 8.5 | 9 | | Re-worded | Percentage of prescriptions lacking the required patient information. |
| 4.3 | Percentage of prescriptions with all the required prescriber’s information. | | Core indicator | 9 | 9 | 9 | 8.5 | 9 | 8.5 | | Re-worded | Percentage of prescriptions lacking the required prescriber’s information. |
| 4.4 | Percentage of prescriptions with all the required information of prescribed medicines. | | Core indicator | 9 | 9 | 9 | 9 | 9 | 9 | | Re-worded | Percentage of prescriptions lacking the required information of prescribed medicines. |
| 4.5 | Percentage of prescriptions with erroneous information of prescribed medicines  (Name, strength, frequency and number of units and duration). | | Core indicator | 9 | 9 | 9 | 9 | 9 | 9 | | Re-worded | Percentage of prescriptions having any erroneous information of prescribed medicines. |
| 4.6 | Percentage of prescriptions with the duplication of drugs in the same class or inappropriate combinations. | | Core indicator | 9 | 9 | 8 | 8 | 9 | 9 | | Split and included as two indicators | Percentage of prescriptions having duplication of medicines in the same class.  Percentage of prescriptions with inappropriate medicine combination. |
| 4.7 | Percentage of prescriptions with two or more medicines prone to cause clinically harmful drug-drug interactions. | | Core indicator | 9 | 9 | 8 | 9 | 9 | 8 | | Included | Percentage of prescriptions with medicines having the potential to cause clinically harmful drug-drug interactions. |
| 4.8 | Percentage of prescriptions having more than 4 drugs. | | Core indicator | 6 | 5 | 8 | 8 | 6 | 8 | | Re-worded | Percentage of prescriptions having 5 or more prescribed medicines. |
| 4.9 | Percentage of prescriptions with at least one high risk / alert medicine from a list of high risk/ alert medicines applicable to the setting. | | Core indicator | 8 | 8 | 8 | 7 | 7 | 8 | | Included | Percentage of prescriptions having high risk / alert medicines from a list of high risk/ alert medicines applicable to the setting. |
| 4.10 | Percentage of prescriptions with at least one error prone abbreviation from a list of error prone abbreviations applicable to the setting. | | Core indicator | 9 | 9 | 8 | 8 | 9 | 8 | | Re-worded | Percentage of prescriptions having error prone abbreviations. |
| 4.11 | Percentage of prescriptions in which all the details are not legible. | | Core indicator | 9 | 9 | 7.5 | 6 | 8 | 8 | | Re-worded | Percentage of prescriptions that are not legible. |
| 4.12 | Percentage of prescriptions where dose calculations required. | | Supplementary indicator | 7.5 | 7.5 | 7 | 7.5 | 8 | 8 | | Included | Percentage of prescriptions requiring dose calculations. |
| 4.13 | Percentage of prescriptions where there are unintended essential omissions. | | Supplementary indicator | 8 | 8 | 7 | 6.5 | 8 | 8 | | Re-worded | Percentage of prescriptions with unintended omissions of medicines. |
| 4.14 | Percentage of prescriptions where therapeutic monitoring is required. | | Supplementary indicator | 8 | 8 | 7 | 7 | 7.5 | 8 | | Included | Percentage of prescriptions requiring therapeutic monitoring. |
| 4.15 | Percentage of prescriptions with at least one look alike sound alike (LASA) medicine from a list of LASA medicines applicable to the setting. | | Core indicator | 8 | 8 | 8 | 7 | 8 | 8 | | Re-worded | Percentage of prescriptions having at least one look alike sound alike (LASA) medicine. |
| 4.16 | Percentage of prescriptions where contraindicated (including allergies) medicines are prescribed. | | Core indicator | 9 | 9 | 7.5 | 8 | 8.5 | 8 | | Re-worded | Percentage of prescriptions having contraindicated (including allergies) medicines. |
| 4.17 | Percentage of instances where patients regular  medicines are not included into the drug chart at admission. | | Core indicator | 9 | 9 | 8 | 8.5 | 8.5 | 8 | | Combined indicator 4.17 and 4.18 | Percentage of instances where medication reconciliation is not done at transitions of care. |
| 4.18 | Percentage of instances where patients regular  medicines are not included into the prescription at discharge. | | Core indicator | 8.5 | 8.5 | 8 | 8 | 8 | 8 | |  |  |
| **5** | **Indicators for Medication Safety in transcribing** | | | | | | | | | | | |
| 5.1 | Percentage of verbal drug orders received. | | Supplementary indicator | 8 | 7.5 | 5.5 | 6 | 7 | 6.5 | | Revised | Non-availability of a protocol for verbal drug orders.  To be answered as Yes/No |
| 5.2 | Percentage of prescriptions clarified from the prescriber. | | Core indicator | 8 | 8 | 5 | 7 | 7.5 | 8 | | Excluded |  |
| 5.3 | Percentage of prescriptions with calculations not double checked by another health care professional. | | Supplementary indicator | 7 | 8 | 6 | 6 | 7 | 7 | | Excluded |  |
| 5.4 | Percentage of settings without an established list of error prone abbreviations. | | Supplementary indicator | 8 | 7 | 6 | 8 | 8 | 8 | | Excluded |  |
| 5.5 | Percentage of settings without an established  policy for expressing error prone dosing regimens of medicines in hospital level. | | Core indicator | 7.5 | 7.5 | 5.5 | 6 | 7.5 | 7 | | Excluded |  |
| 5.6 | Percentage of settings without the availability of the electronic prescribing facility | | Core indicator | 7 | 6 | 7 | 8 | 7 | 6 | | Excluded |  |
| 5.7 | Percentage of drug charts with transcribing errors | | Core indicator | 8 | 8 | 8 | 8 | 8 | 8 | | Included with word rearrangement | Percentage of prescription charts with transcribing errors. |
| 5.8 | Percentage of drug labels with transcribing errors | | Core indicator | 9 | 9 | 8.5 | 9 | 9 | 9 | | Included with revision | Percentage of medicines labels with transcribing errors. |
| **6** | | **Indicators for Medication Safety in preparation and dispensing of medicines** | | | | | | | | | | |
| 6.1 | Percentage of registered pharmacists involved in dispensing medicines | | Core indicator | 8.5 | 8 | 8.5 | 8.5 | 8 | 8 | | Re-worded | Percentage of unregistered pharmacists involved in dispensing medicines. |
| 6.2 | Percentage of pharmacists whose average dispensing time is lower than 3 minutes (WHO recommended value) | | Supplementary indicator | 7.5 | 6 | 6 | 7 | 6 | 7 | | Included | Percentage of pharmacists whose average dispensing time is less than 3 minutes (WHO recommended value: ≥ 3 minutes) |
| 6.3 | Percentage of patients whose name and age is not verified prior to dispensing the medicines. | | Core indicator | 9 | 9 | 8 | 8 | 8 | 8 | | Included | Percentage of patients whose name and age are not verified prior to dispensing the medicines. |
| 6.4 | Percentage of settings not conducting an annual assessment on sterile reconstitution of parenteral medications where it is indicated. | | Supplementary indicator | 8 | 7 | 7 | 7 | 7 | 7 | | Revised | Percentage of settings using safety cabinets for reconstitution of chemotherapeutic agents. |
| 6.5 | Percentage of patients received at least one medicine without proper labeling. (include patient name, drug name, strength, quantity, dosage instructions) | | Core indicator | 9 | 9 | 8 | 8 | 8.5 | 8 | | Revised | Percentage of patients not receiving properly labeled medicines in patients’ language. |
| 6.6 | Percentage of patients received at least one  medicine without proper packaging | | Core indicator | 8 | 8 | 7 | 7 | 8 | 8 | | Included | Percentage of patients receiving dispensed medicine without proper packaging |
| 6.7 | Percentage of patients not asked about allergic conditions. | | Core indicator | 9 | 9 | 8 | 8 | 8 | 8 | | Re-worded | Percentage of patients whose allergic history was not checked prior to dispensing medicines. |
| 6.8 | Percentage of patients not advised on food interaction with drugs where relevant. | | Supplementary indicator | 7 | 7 | 6 | 7 | 7 | 7 | | Excluded |  |
| 6.9 | Percentage of prescriptions for high alert medications that are not double checked and documented by pharmacist. | | Supplementary indicator | 8 | 8 | 7 | 8 | 8 | 8 | | Revised | Percentage of prescriptions containing high alert medications. |
| 6.10 | Percentage of pharmacists involving compounding and dispensing, who are  not maintaining proper personal hygiene. (Washing hands, wearing masks, hand gloves, hair caps etc.) | | Core indicator | 8 | 8 | 7 | 7 | 8 | 8 | | Included | Percentage of personnel attending to compounding of extemporaneous preparations, without maintaining proper hygiene techniques. (Washing hands, wearing masks, hand gloves, hair caps etc.) |
| 6.11 | Percentage of instances where dispensing  prescription-only medicines without a proper prescription (e.g.: Outdated, No prescriber’s signature and seal) | | Core indicator | 9 | 9 | 8 | 8 | 8 | 8 | | Included | Percentage of instances where prescription-only medicines were dispensed without a valid prescription (e.g.: not up-to-dated, without prescriber’s signature and seal) |
| 6.12 | Percentage of patients not aware of key information (Name, dose, indication, frequency and other special instructions) of the medicines they received. | | Core indicator | 8.5 | 8 | 7 | 8 | 8 | 8 | | Included | Percentage of patients unaware of the key information of the medicines they received (Name, indication, dose, frequency and method of administration). |
| 6.13 | Percentage of dispensed prescriptions found to have any discrepancy with five rights: Right drug, Right dose, Right route of  administration, Right time and Right patient. | | Core indicator | 9 | 9 | 7 | 6 | 9 | 9 | | Excluded (due to repetition) |  |
| 6.14 | Percentage of patients who are not aware of the common and important adverse effects of his medicines and what to do in such situation. | | Core indicator | 8.5 | 8 | 8 | 8 | 8 | 8 | | Included | Percentage of patients who are unaware of the common and important adverse effects of his medicines and what to do in such situation. |
| 6.15 | Percentage of error in the prescription passed to the patient without detection. | | Core indicator | 9 | 9 | 8.5 | 9 | 8 | 8 | | Included | Percentage of prescribing errors not detected at the point of dispensing. |
| 6.16 | Percentage of instances where hospital pharmacist contacted patient due to a medication error or quality failure of a medicine, within a defined time period. | | Supplementary indicator | 8 | 8 | 7 | 8 | 8 | 7.5 | | Revised | Non-Availability of a procedure for the pharmacists to contact patients in a case of a medication error or quality failure of a medicine.  To be answered as Yes/No |
| 6.17 | Percentage of settings without having a separate area for patient counseling. | | Core indicator | 8 | 8 | 7.5 | 7.5 | 8 | 7.5 | | Revised | Non-Availability of a separate area for patient counseling.  To be answered as Yes/No |
| 6.18 | Percentage of pharmacists not using tablet counting devices to count the tablets. | | Supplementary indicator | 7 | 7 | 7.5 | 7.5 | 7.5 | 7.5 | | Revised | Non-Availability of tablet counting devices in the setting.  To be answered as Yes/No |
| 6.19 | Percentage of settings not having a guideline to avoid misuse of medicines (e.g. Opioids, Antibiotics) | | Core indicator | 8 | 8 | 8 | 8 | 8 | 8 | | Revised | Non-Availability of standard treatment guidelines. (e.g. Opioids, Antibiotics)  To be answered as Yes/No |
| **7** | **Indicators for Medication Safety in administration of medicines**  **(A) Administration of medicines to inward patients** | | | | | | | | | | | |
| 7.1 | Percentage of patients, at least one erroneous administration of medicines was observed. | | Core indicator | 9 | 9 | 7 | 8 | 8 | 8 | | Re-worded | Percentage of patients with any errors related to medicines administration. |
| 7.2 | Percentage of patients, where at least 2 identifiers of the patient were not used to verify patient identity during administration of medicines. | | Core indicator | 9 | 8 | 6 | 8 | 8 | 7.5 | | Re-worded | Percentage of patients, where patient identity was not verified before administration of medicines. |
| 7.3 | Percentage of patients, for whom each medication dose administered is not documented promptly in medication chart. | | Core indicator | 9 | 9 | 8 | 8 | 8 | 8 | | Included | Percentage of patients, where the medication administration was not documented in the medication chart. |
| 7.4 | Percentage of patients with high alert medications where the observer noted that there was a double checking for five rights. | | Core indicator | 9 | 8.5 | 8 | 8 | 8 | 8.5 | | Re-worded | Percentage of patients administered medicines with an error in one of the five rights. (The right patient, The right drug, The right dose, The right route of administration, The right time). |
|  |  | |  |  |  |  |  |  |  | |  |
| 7.5 | Percentage of high alert medicines which are not labeled as high alert to differentiate from other medications. | | Core indicator | 9 | 8 | 8 | 8 | 8 | 8 | | Excluded |
| 7.6 | Percentage of settings where high risk medicines have been kept in patient care areas without proper labeling (e.g.: KCl, heparin  vials together with sterile water for injections as flush solutions) | | Core indicator | 8 | 8 | 8 | 8 | 8 | 8 | | Re-worded | Percentage of patient care areas storing high alert medicines without separating from other medicines. (e.g.: KCl, heparin vials together with sterile water for injections as flush solutions). |
| 7.7 | Percentage of patients not advised on possible serious adverse effects that they may experience where relevant. | | Core indicator | 8 | 8 | 7 | 7 | 8 | 8 | | Revised. | Percentage of medicines administrations without checking for potential to develop serious adverse effects. |
| 7.8 | Percentage of instances where established policies / operating procedures / technologies (e.g.: computerized decision support systems, barcode readers, smart infusion pumps) were used to help nurses to safely administer medicines. | | Supplementary indicator | 8 | 8 | 8 | 8 | 8 | 8 | | Revised | Non-availability of following technologies for administration of medicines:  7.6.1. Computerized decision support systems 7.6.2. Barcode aided medicines administration (BCMA) systems 7.6.3. Smart infusion pumps  To be answered as Yes/No |
| 7.9 | Percentage of instances where eye or ear drops in same container is used for more than one patient. | | Core indicator | 8 | 8 | 7 | 8 | 8 | 8 | | Re-worded | Percentage of administrations where single user eye or ear drops are used for multiple patients. |
| 7.10 | Percentage of instances where a single use medical device is used more than once to administer drugs. | | Core indicator | 9 | 9 | 8 | 8 | 8 | 8 | | Re-worded | Percentage of administrations where single user medical devices are used in multiple patients. |
| 7.11 | Percentage of reconstituted IV solutions (e.g.:  chemotherapy, pediatric infusions) without  complying with the labeling requirements. | | Core indicator | 9 | 9 | 8 | 8 | 8 | 8 | | Re-worded | Percentage of reconstituted IV solutions that were not labeled according to requirements. |
| 7.12 | Percentage of instances where errors in reconstitutions have been occurred. | | Supplementary indicator | 8 | 8 | 6 | 7 | 8 | 8 | | Re-worded | Percentage of IV solutions (e.g.: chemotherapy, pediatric infusions, iv antibiotics) that were not reconstituted according to recommended practices. |
| 7.13 | Percentage of instances where errors in  calculations have been made in the observed  number of administrations involving calculations. | | Core indicator | 9 | 8 | 6 | 7 | 8 | 8 | | Re-worded | Percentage of medicines requiring dosage calculations performed inaccurately. |
| 7.14 | Percentage of instances where errors made in the administrations involving IV lines in ICU settings. | | Supplementary indicator | 8 | 9 | 7 | 7 | 8 | 8 | | Re-worded | Percentage of patients with multiple IV lines not distinguished by proper labeling. |
|  | **(B) Administration of medicines by patients at home** | | | | | | | | | | | |  | **(B) Administration of medicines by patients at home** |
| 7.15 | Percentage of patients who did not store medicines at home under recommended conditions. | | Core indicator | 8 | 8 | 6 | 7 | 7 | 7 | | Re-worded | Percentage of patients not storing medicines at home in separate containers with recommended labeling. |
| 7.16 | Percentage of patients whose medications were stored at home unsafely (with access to children, not under lock and key, where medicines can be mistaken for one another). | | Supplementary indicator | 8 | 8 | 6 | 7 | 8 | 7 | | Combined indicators 7.16 and 7.17. | Percentage of patients not storing medicines in a secured area. |
| 7.17 | Percentages of out-patients in a representative sample, whose medication were not properly separated from other medications when storing. | | Supplementary indicator | 7 | 8 | 6 | 6 | 6 | 6 | |
| 7.18 | Percentage of patients who admitted at least one erroneous administration of medicines, within a defined time period. | | Core indicator | 9 | 9 | 8 | 8 | 8 | 8 | | Re-worded | Percentage of patients admitting taking medicines erroneously within a specified time period (E.g.: three months). |
| 7.19 | Percentage of patients who admitted self- administering antibiotics in a representative sample. | | Core indicator | 9 | 9 | 7 | 8 | 8 | 8 | | Revised | Percentage of patients admitting self-medication of prescription only medicines. |
| **8** | **Indicators for Medication Safety in monitoring of medicines** | | | | | | | | | | | |
| 8.1 | Percentage of medication errors not reported to Quality & safety unit within a defined time period. | | Core indicator | 8 | 9 | 6 | 8 | 8 | 8 | Excluded | |  |
| 8.2 | Percentage of instances where medication errors were identified and no preventive action taken. | | Core indicator | 8 | 8 | 8 | 8 | 8 | 8 | Re-worded | | Percentage of errors where any preventive actions were taken following reporting. |
| 8.3 | Percentage of adverse drug reactions reported to NMRA. | | Core indicator | 9 | 9 | 8 | 8 | 8 | 8 | Split into two indicators | | Number of Adverse Drug Reactions reported per year.  Percentage of adverse drug reactions where causality assessment was performed by the regulatory authority. |
| 8.4 | Percentage of medication error / ADR related  admissions reported to the hospital. | | Core indicator | 8 | 8 | 8 | 8 | 8 | 8 | Split into two indicators. | | Number of Medication Errors reported per year  Percentage of medication related admissions. |
| 8.5 | Percentage of patients on long term medicines who had not a drug regimen review within a defined period. | | Core indicator | 8 | 8 | 6 | 8 | 9 | 8 | Excluded | |  |
| 8.6 | Percentage of patients on lithium, without recommended monitoring. | | Core indicator | 8.5 | 9 | 8.5 | 9 | 9 | 8.5 | Revised | | Percentage of patients on Lithium, without lithium level being tested within the last 6 months. |
| 8.7 | Percentage of elderly patients on thiazide or  loop diuretic without recommended monitoring | | Core indicator | 8 | 7.5 | 7 | 8 | 7.5 | 7.5 | Revised | | Percentage of patients on diuretics without electrolytes being monitored. |
| 8.8 | Percentage of patients on warfarin, without  Recommended monitoring. | | Core indicator | 9 | 9 | 8.5 | 9 | 9 | 9 | Revised | | Percentage of patients on warfarin, without INR being monitored. |
| 8.9 | Percentage of patients on amiodarone, without recommended monitoring. | | Supplementary indicator | 8 | 8 | 7.5 | 8 | 8 | 8 | Revised | | Percentage of patients on amiodarone, without liver function and thyroid function being monitored. |
| 8.10 | Percentage of patients on ACE inhibitor or angiotensin II receptor antagonist, without recommended monitoring. | | Supplementary indicator | 8 | 8 | 8 | 8 | 8 | 8 | Revised | | Percentage of patients on ACE inhibitor or angiotensin II receptor antagonist, without electrolytes and creatinine being measured prior to starting therapy and within 2-4 weeks after starting the therapy. |
| 8.11 | Percentage of patients on methotrexate weekly, without recommended monitoring. | | Core indicator | 9 | 9 | 8 | 9 | 9 | 9 | Revised | | Percentage of patients on methotrexate weekly, without full blood count and liver function being monitored within 3 months. |
| 8.12 | Percentage of patients with renal impairment  and prescribed an aminoglycoside without  dose frequency adjustment. | | Core indicator | 8.5 | 8 | 7 | 8 | 8 | 8 | Revised | | Percentage of patients prescribed an aminoglycoside, without monitoring renal function. |
| 8.13 | Percentage of patients with estimated glomerular filtration rate <30 ml min-1 (1.73 m)-2 and prescribed metformin. | | Core indicator | 9 | 9 | 8 | 8 | 8 | 8.5 | Revised | | Percentage of patients with mild renal impairment (CKD Stage 2 / Grade II), prescribed metformin without monitoring renal function. |
