# Supplementary material for: Development of indicators to assess medication safety – An experience from a resource limited healthcare setting
Source: Research Square preprint supplement (doi:10.21203/rs.3.rs-6910993/v1), 2025-07-17
Supplement: Supplementary file 3 [file fc0968a973e77b790707e13b.docx]

| **Appendix 03: The final list of indicators appropriate to assess medication safety in resource limited healthcare settings** | | | | | |
| --- | --- | --- | --- | --- | --- |
| **No.** | **Indicator** | **Categorization** | | **Limitations** |
| **Structure / Process/ Outcome** | **Core (C) /  Supplementary (S)** |
| **01** | **Medication Safety Indicators for regulation of medicines** | | | |
| **1.1.** | Percentage of unregistered medicines in a sample of medicines evaluated. **Numerator:** Number of registered medicines identified. **Denominator:** Total number of medicines in the sample investigated. | Outcome | C | May not be applicable for the state sector hospitals. |
| **1.2.** | Percentage of pharmacies not registered with the regulatory authority  **Numerator:** Number of pharmacies without registration by the Regulatory Authority **Denominator:** Total number of pharmacies in the selected sample. | Outcome | C | May not be applicable for the state sector hospitals. |
| **1.3.** | Number of ADRs reported to National ADR reporting System annually per 100,000 population. **Numerator:** Total number of ADR reports reported to National ADR reporting System annually  **Denominator:** Midyear population of the country (in multiples of 100,000) | Outcome | C | Under reporting of ADRs. |
| **1.4.** | Percentage of community pharmacies without the physical presence of a registered pharmacist.  **Numerator:** Number of community pharmacies without the physical presence of at least one registered pharmacist at the time of inspection. **Denominator:** Total number of pharmacies in the selected sample. | Outcome | C | Not applicable for the state sector as only registered pharmacists are employed. |
| **1.5.** | Percentages of medicines not complying with the labeling requirements specified by the Regulatory Authority. **Numerator:** Number of medicines not complying with the labeling requirements specified by the Regulatory Authority.  **Denominator:** Total number of medicines in the sample investigated. | Outcome | S | ------ |
| **1.6.** | Percentage of medicines not accompanied by product information leaflet which is in accordance to the original Summery of Product Characteristics (SPC). **Numerator:** Number of selected medicines accompanied by product information leaflet which is in accordance to the original Summery of Product Characteristics (SPC). **Denominator:** Total number of medicines in the sample investigated. | Outcome | S | ------ |
| **1.7.** | Percentage of medicines not accompanied by an information leaflet for patients according to the requirements of the regulatory authority.  **Numerator:** Number of medicines not accompanied by a patient information leaflet according to the requirements of the regulatory authority.  **Denominator:** Number of medicines containing a patient information leaflet in the sample investigated. | Outcome | C | May not be applicable to all medicines |
| **1.8.** | Percentage of essential medicines with only one registered supplier.  **Numerator:** Number of essential medicines with only one registered supplier. **Denominator:** Total number of registered essential medicines studied during evaluation. | Process | S | Having only one supplier may also be not adequate |
| **1.9.** | Percentage of essential medicines registered with more than 20 different suppliers. Numerator: Number of essential medicines registered with more than 20 different suppliers in different brand names. Denominator: Total number of registered medicines at the time of evaluation. | Process | S | Having less than 20 suppliers (for example 15) may also be too many suppliers |
| **1.10.** | Percentage of quality failed medicines. **Numerator:** Number quality failed d medicines detected annually by the regulatory authority. **Denominator:** Total number of complaints on medicines received by the regulatory authority within a one-year period. | Process | C | Depends on the number of quality testing done and quality failures reported. |
| **1.11.** | Percentage of random samples of medicines collected by the regulatory authority and found have quality failures. **Numerator:** Number of medicines found to have quality failures. **Denominator:** Total number of random samples of medicines collected by the regulatory authority within one year. | Process | C | Not applicable if random samples not done. |
| **1.12.** | Percentage of Look-alike, Sound-alike (LASA) medicines identified by the regulatory authority at registration annually.  **Numerator:** Number of LASA medicines identified at registration.  **Denominator:** Total number of medicines registered. | Process | C | ------ |
| **1.13.** | Non - Availability of a National Medication safety action plan.  To be answered as Yes/No | Structure | C | ------ |
| **1.14.** | Non - Availability of internationally accepted dossier format for the regulatory authority.  To be answered as Yes/No | Structure | S | ------ |
| **1.15.** | Non - Availability of a nationally developed list of high risk-medicines that is considered during registration of medicines.  To be answered as Yes/No | Structure | C | ------ |
| **1.16.** | Non - Availability of a list of look-alike and sound-alike medications that is considered during registration of medicines  To be answered as Yes/No | Structure | S | ------ |
| **02** | **Medication Safety Indicators for procurement of medicines** | | | |
| **2.1** | Percentage of medicines purchased outside the approved formulary list of medicines for the selected setting.  **Numerator:** Number of medicines purchased outside of the approved formulary list of medicines for the selected setting.  **Denominator:** Total number of medicines purchased per annum for the selected setting. | Outcome | C | Applicable only for public sector. |
| **2.2.** | Percentage of essential medicines not available in the setting. **Numerator:** Number of essential medicines not available from the selected list for the setting. **Denominator:**  Total number of essential medicines list selected for the setting. | Outcome | S | Depend on the selected list of essential medicines. |
| **2.3.** | Average percentage of medicines with the expiry date less than one year at procurement.  **Numerator:** Total of percentages of selected medicines with the expiry date less than one year at procurement.  **Denominator:** The number of selected medicines procured in that year. | Outcome | C | Even a shorter expiry medicine could be used before expiry if it is fast-moving. |
| **2.4.** | Percentage of medicines (except bio similar medicines) that has not undergone sample testing prior to purchasing. **Numerator:** Number of medicines (except bio similar medicines) that has not undergone sample testing prior to purchasing. **Denominator:** Total number of medicines (except bio similar medicines) purchased within a year. | Process | C | Applicable only for public sector. |
| **2.5.** | Unavailability of a procedure to ensure the cold chain maintenance during pre-shipment and delivery.  To be answered as Yes/No | Structure | C | ---- |
| **2.6.** | Not using a mechanism to ensure that only registered medicines are procured.  To be answered as Yes/No | Structure | C | ------ |
| **03** | **Medication Safety Indicators for storage and distribution of medicines** | | | |
| **3.1.** | Percentage of look-alike and sound-alike (LASA) medicines which are not clearly identified in labeling.  **Numerator:** Number of look-alike and sound-  (LASA) medicines, not clearly identified in labeling. **Denominator:** Total number of LASA medicines available in the selected setting. | Process | C | Not applicable for the bulk storage settings. |
| **3.2.** | Percentage of high risk/alert medicines which are not clearly identified as a high-risk medicine in their labels. **Numerator:** Number of high-risk medicines which are not clearly identified in their labels. **Denominator:** Total number of high-risk medicines available in the selected setting. | Process | C |
| **3.3.** | Percentage of settings without an identified LASA medicines list.  **Numerator:** Number of settings without an identified LASA medicines list. **Denominator:** Total number of settings studied. | Structure | S |
| **3.4.** | Percentage of settings without an identified high alert medicines list. **Numerator:** Number of settings without an identified high alert medicines list. **Denominator:** Total number of settings studied. | Structure | S |
| **3.5.** | Percentage of staff involved in medication use, who are not aware of the list of LASA medicines and of high-risk medicines available at the stores.  **Numerator:** Number of staff involved in medication use, who are not aware of the list of LASA medicines and of high-risk medicines available at the stores. **Denominator:** Total number of staff involved in medication use in the stores. | Process | C | Not applicable for the bulk storage settings. |
| **3.6.** | Percentage of settings where expired, recalled, damaged or spoilt medicines not stored separately.  **Numerator:** Number of settings where expired, recalled, damaged or spoilt medicines not stored in a segregated area without identifying as medicines not for use.  **Denominator:**  Total number of settings studied. | Process | C | ---- |
| **3.7.** | Percentage of settings where medicines are stored directly on the floor.  **Numerator:** Number of settings where medicines are stored directly on the floor.  **Denominator:**  Total number of settings studied. | Process | S | ----- |
| **3.8.** | Percentage of settings where prepackaged* medicines, including extemporaneous products are not complying with the labeling requirements.  **Numerator:** Number of settings where prepackaged* medicines, including extemporaneous products are not complying with the labeling requirements.  **Denominator:**  Total number of settings studied.  **Prepacked medicines refer to medicines prepared for dispensing to patients from bulk containers* | Process | C | Applicable only for the pharmacy settings where dispensing of medicines to the patients takes place. |
| **3.9.** | Percentage of settings without complete temperature monitoring logs for cold storage. **Numerator:** Number of settings without complete temperature monitoring logs for cold storage.  **Denominator:** Total number of settings studied. | Process | C | Not applicable for the settings do not store medicines requiring cold storage. |
| **3.10.** | Percentage of settings where the schedule III drugs (Dangerous drugs) are not stored under a lock and key.  **Numerator:** Number of settings where the schedule III drugs (Dangerous drugs) are not stored under a lock and key.  **Denominator:** Total number of settings studied. | Process | C | Not applicable for the settings do not store schedule III medicines. |
| **3.11.** | Percentage of settings where all the storage areas are not covered by air conditioners to maintain the temperature at 20°C to 25°C.  **Numerator:** Number of settingswhere all the storage areas are not air conditioned.  **Denominator:** Total number of settings studied. | Outcome | C | Applicable only for the settings where the temperature goes above 250C |
| **3.12.** | Percentage of settings where the cold rooms / refrigerators are not equipped with an alternative power system.  **Numerator:** Number of settings where the cold rooms / refrigerators are not equipped with an alternative power system.  **Denominator:** Total number of settings studied. | Structure | C | ---- |
| **3.13.** | Percentage of settings without having devices to monitor temperature and relative humidity.  **Numerator:** Number of settings without having devices to monitor temperature and relative humidity.  **Denominator:**  Total number of settings studied. | Structure | C | --- |
| **3.14.** | Percentage of medicines transporting vehicles not equipped with temperature monitoring devices. **Numerator:** Number of medicines transporting vehicles not equipped with temperature monitoring devices. **Denominator:** Total number of medicines transporting vehicles owned by the settings studied. | Structure | C | --- |
| **04.** | **Medication Safety Indicators for prescribing** | | | |
| **4.1.** | Percentage of medicines prescribed without indicating the generic name.  **Numerator:** Number of medicines prescribed without indicating the generic name. **Denominator:** Total number of medicines prescribed in the prescriptions studied. | Process | C | --- |
| **4.2.** | Percentage of prescriptions lacking the required patient information.  **Numerator:** Number of prescriptions lacking the required patient information (Patient’s name, age, weight* and gender) **Denominator:** Total number of prescriptions studied. | Process | C | Weight is required if the age of the patient is below 12 years |
| **4.3.** | Percentage of prescriptions lacking the required prescriber’s information.  **Numerator:** Number of prescriptions lacking the required prescriber’s information.  **Denominator:** Total number of prescriptions studied. | Process | C | ---- |
| **4.4.** | Percentage of prescriptions lacking the required information of prescribed medicines. **Numerator:** Number of prescriptions lacking the required information of prescribed medicines.  **Denominator:** Total number of prescriptions studied. | Process | C | ---- |
| **4.5.** | Percentage of prescriptions having any erroneous information of prescribed medicines **Numerator:** Number of prescriptions having any erroneous information of prescribed medicines (Name, strength, frequency and number of units and duration). **Denominator:** Total number of prescriptions studied. | Process | C | Accuracy of the information should be checked based on the published guidelines for the individual patient’s condition of illness. |
| **4.6.** | Percentage of prescriptions having duplication of medicines in the same class. **Numerator:** Number of prescriptions having duplication of medicines in the same class. **Denominator:** Total number of prescriptions studied. | Process | C | ---- |
| **4.7.** | Percentage of prescriptions with inappropriate medicine combination. **Numerator:** Number of prescriptions with inappropriate medicine combination. **Denominator:** Total number of prescriptions studied. | Process | C | ---- |
| **4.8.** | Percentage of prescriptions with medicines having the potential to cause clinically harmful drug-drug interactions. **Numerator:** Number of prescriptions with medicines having the potential to cause clinically harmful drug – drug interactions. **Denominator:** Total number of prescriptions studied. | Process | C | ---- |
| **4.9.** | Percentage of prescriptions having 5 or more prescribed medicines. **Numerator:** Number of prescriptions having 5 or more prescribed medicines. **Denominator:** Total number of prescriptions studied | Process | C | ---- |
| **4.10.** | Percentage of prescriptions having high risk / alert medicines from a list of high risk/ alert medicines applicable to the setting. **Numerator:** Number of prescriptions having high risk medicines. **Denominator:** Total number of prescriptions studied | Process | C | This does not indicate an error, but it is a risk factor for errors and potential patient harm unless care is taken. |
| **4.11.** | Percentage of prescriptions having error prone abbreviations.  **Numerator:** Number of prescriptions having error prone abbreviations. **Denominator:** Total number of prescriptions studied. | Process | C | ---- |
| **4.12.** | Percentage of prescriptions that are not legible. **Numerator:** Number of prescriptions that are not legible. **Denominator:** Total number of prescriptions studied. | Process | C | Legibility can be subjective and how it is identified should be defined. |
| **4.13.** | Percentage of prescriptions requiring dose calculations. **Numerator:** Number of prescriptions requiring dose calculations required. **Denominator:** Total number of prescriptions studied. | Process | S | ---- |
| **4.14.** | Percentage of prescriptions with unintended omissions of medicines. **Numerator:** Numberof prescriptions with unintended omission of medicines. **Denominator:** Total number of prescriptions studied. | Process | S | ---- |
| **4.15.** | Percentage of prescriptions requiring therapeutic monitoring. **Numerator:** Numberof prescriptions requiring therapeutic monitoring. **Denominator:** Total number of prescriptions studied. | Process | S | This does not indicate an error, but it is a risk factor for errors and potential patient harm unless monitoring is done. |
| **4.16.** | Percentage of prescriptions having at least one look alike sound alike (LASA) medicine. **Numerator:** Numberof prescriptions having at least one look alike sound alike (LASA) medicine. **Denominator:** Total number of prescriptions studied. | Process | C | This does not indicate an error, but it is a risk factor for errors and potential patient harm unless care is taken. |
| **4.17.** | Percentage of prescriptions having contraindicated (including allergies) medicines. **Numerator:** Numberof prescriptions having contraindicated medicines. **Denominator:** Total number of drug charts studied. | Process | C | Applicable for hospital settings where clinical records of patients can be assessed. |
| **4.18.** | Percentage of instances where medication reconciliation is not done at transitions of care*. **Numerator:** Number of instances where medication reconciliation is not done at transitions of care*. **Denominator:** Total number of patients studied.  **Transitions of care includes admissions, discharges, transfers, clinic visits and any encounters with health care professionals where medicines can be changed.* | Process | C | Applicable only for hospital settings where clinical records of patients can be assessed. |
| **05** | **Medication Safety Indicators for transcribing of medicines** | | | |
| **5.1.** | Non-availability of a protocol for verbal drug orders.  To be answered as Yes/No | Structure | S | Applicable only for hospital settings. |
| **5.2.** | Percentage of prescription charts with transcribing errors.  **Numerator:** Number of prescription charts with transcribing errors.  **Denominator:** Total number of prescription charts studied. | Outcome | C | Applicable only for hospital settings. |
| **5.3.** | Percentage of medicines labels with transcribing errors.  **Numerator:** Number of drug labels with transcribing errors.  **Denominator:** Total number of medicines labels studied. | Outcome | C | --- |
| **06** | **Medication Safety Indicators for dispensing of medicines** | | | |
| **6.1.** | Percentage of unregistered pharmacists involved in dispensing medicines.  **Numerator:** Number of unregistered pharmacists involved in dispensing medicines **Denominator:** Total number of people involved in dispensing medicines. | Process | C | --- |
| **6.2.** | Percentage of pharmacists whose average dispensing time is less than 3 minutes (WHO recommended value: ≥ 3 minutes)  **Numerator:** Number of pharmacists whose average dispensing time is less than 3 minutes. **Denominator:** Total number of pharmacists involved in dispensing medicines. | Process | S | --- |
| **6.3.** | Percentage of patients whose name and age are not verified prior to dispensing the medicines.  **Numerator:** Number of patients whose name and age are not verified prior to dispensing the medicines. **Denominator:** Total number of patients studied. | Process | C | --- |
| **6.4.** | Percentage of settings using safety cabinets for reconstitution of chemotherapeutic agents.  **Numerator:** Number of settings using safety cabinets for reconstitution of chemotherapeutic agents.  **Denominator:** Total number of settings reconstituting chemotherapeutic agents. | Process | S | Applicable only for the settings where reconstitution of Chemotherapeutic agents is carried out. |
| **6.5.** | Percentage of patients not receiving properly labeled medicines in patients’ language.  **Numerator:** Number of not receiving properly labeled medicines in patients’ language.  **Denominator:** Total number of patients studied. | Process | C | --- |
| **6.6** | Percentage of patients receiving dispensed medicine without proper packaging **Numerator:** Number of patients receiving at least one dispensed medicine without adequate packaging. **Denominator:** Total number of patients studied. | Process | C | --- |
| **6.7.** | Percentage of patients whose allergic history was not checked prior to dispensing medicines.  **Numerator:** Number of patients whose allergic history was not checked prior to dispensing medicines.  **Denominator:** Total number of patients studied. | Process | C | --- |
| **6.8.** | Percentage of prescriptions containing high alert medications.  **Numerator:** Number of prescriptions containing at least one high alert medication. **Denominator:** Total number of prescriptions studied | Process | S | This does not indicate an error, but it is a risk factor for errors and potential patient harm unless care is taken. |
| **6.9.** | Percentage of personnel attending to compounding of extemporaneous preparations, without maintaining proper hygiene techniques. (Washing hands, wearing masks, hand gloves, hair caps etc.)  **Numerator:** Number of pharmacists involving compounding extemporaneous preparations.  **Denominator:** Total number of personnel involved in dispensing medicines in the selected setting. | Process | C | --- |
| **6.10.** | Percentage of instances where prescription-only medicines were dispensed without a valid prescription (e.g.: not up-to-dated, without prescriber’s signature and seal)  **Numerator:** Number of instances where prescription-only medicines were dispensed without a valid prescription.  **Denominator:** Total number of patients dispensed medicines. | Process | C | --- |
| **6.11.** | Percentage of patients unaware of the key information of the medicines they received (Name, indication, dose, frequency and method of administration).  **Numerator:** Number of patients unaware of the names and indications of all the medicines they received. **Denominator:** Total number of patients studied. | Outcome | C | --- |
| **6.12.** | Percentage of patients who are unaware of the common and important adverse effects of his medicines and what to do in such situation.  **Numerator:** Number of patients who are unaware of the common and important adverse effects of his medicines and what to do in such situation. **Denominator:** Total number of patients studied. | Outcome | C |  |
| **6.13.** | Percentage of prescribing errors not detected at the point of dispensing.  **Numerator:** Number of prescribing errors not detected at the point of dispensing. **Denominator:** Total number of prescribing errors. | Outcome | C | --- |
| **6.14.** | Non-Availability of a procedure for the pharmacists to contact patients in a case of a medication error or quality failure of a medicine.  To be answered as Yes/No | Structure | S | --- |
| **6.15.** | Non-Availability of a separate area for patient counseling.  To be answered as Yes/No | Structure | C | --- |
| **6.16.** | Non-Availability of tablet counting devices in the setting.  To be answered as Yes/No | Structure | S | --- |
| **6.17.** | Non-Availability of standard treatment guidelines. (e.g. Opioids, Antibiotics)  To be answered as Yes/No | Structure | C | --- |
| **07** | **Indicators for Medication Safety in administration of medicines** | | | |
| **7.1.** | Percentage of patients, where patient identity was not verified before administration of medicines. **Numerator:** Number of patients, where patient identity was not verified before administration of medicines. **Denominator:** Total number of patients studied. | Process | C | Applicable only for the administration of medicines to inward and Emergency Treatment Unit (ETU) patients. |
| **7.2.** | Percentage of patients, where the medication administration was not documented in the medication chart.  **Numerator:** Number of patients, where the medication administration was not documented in the medication chart. **Denominator:** Total number of patients studied. | Process | C | Applicable only for the administration of medicines to inward and ETU patients. |
| **7.3.** | Percentage of patients administered medicines with an error in one of the five rights. (The right patient, The right drug, The right dose, The right route of administration, The right time).  **Numerator:** Number of patients administered medicines with an error in one of the five rights. **Denominator:** Total number of patients studied. | Process | C | Applicable only for the administration of medicines to inward and ETU patients. |
| **7.4.** | Percentage of patient care areas* storing high alert medicines without separating from other medicines. (e.g.: KCl, heparin vials together with sterile water for injections as flush solutions).  **Numerator:** Number of patient care areas* storing high alert medicines without separating from other medicines. **Denominator:** Number of settings studied. | Outcome | C | * Patient care areas may include wards, Intensive Care Units (ICUs), High-Dependency Units (HDUs), Maternity and Neonatal Units and ETUs. |
| **7.5.** | Percentage of medicines administrations without checking for potential to develop serious adverse effects.  **Numerator:** Number medicines administrations without checking for potential to develop serious adverse effects. . **Denominator:** Total number of patients studied. | Process | C | Applicable only for the administration of medicines to inward and ETU patients. |
| **7.6.** | Non-availability of following technologies for administration of medicines:  7.6.1. Computerized decision support systems 7.6.2. Barcode aided medicines administration (BCMA) systems 7.6.3. Smart infusion pumps  To be answered as Yes/No | Structure | S | Applicable only for the administration of medicines to inward and ETU patients. |
| **7.7.** | Percentage of administrations where single user eye or ear drops are used for multiple patients.  **Numerator:** Number of administrations where single user eye or ear drops are used for multiple patients.  **Denominator:** Total number of Eye/ears drop administrations studied. | Process | C | Applicable only for the administration of medicines to inward and ETU patients. |
| **7.8.** | Percentage of administrations where single user medical devices are used in multiple patients.  **Numerator:** Number of administrations where single user medical devices are used in multiple patients. **Denominator:** Total number of instances where single user medical devices are used to administer medicines. | Process | C | Applicable only for the administration of medicines to inward and ETU patients. |
| **7.9.** | Percentage of IV solutions (e.g.: chemotherapy, pediatric infusions, iv antibiotics) that were not reconstituted according to recommended practices. **Numerator:** Number of IV solutions that were not reconstituted according to recommended practices.  **Denominator:** Total number of reconstituted IV solutions available. | Process | C | Applicable only for the administration of medicines to inward and ETU patients. |
| **7.10.** | Percentage of reconstituted IV solutions that were not labeled according to requirements.  **Numerator:** Number of reconstituted IV solutions that were not labeled according to requirements.  **Denominator:** Total number of reconstituted IV solutions available. | Process | S | Applicable only for the administration of medicines to inward and ETU patients. |
| **7.11.** | Percentage of medicines requiring dosage calculations performed inaccurately.  **Numerator:** Number of medicines requiring dosage calculations performed inaccurately.  **Denominator:** Number of administrations involving calculations. | Process | C | Applicable only for the administration of medicines to inward and ETU patients. |
| **7.12.** | Percentage of patients with multiple IV lines not distinguished by proper labeling. **Numerator:** Number of patients with multiple IV lines not distinguished by proper labeling.  **Denominator:** Number of patients with multiple IV lines. | Process | S | Applicable only for the administration of medicines to inward and ETU patients. |
| **7.13.** | Percentage of patients with any errors related to medicines administration.  **Numerator:** Number of patients, with any errors related to medicines administration.  **Denominator:** Total number of patients studied. | Outcome | C | Applicable for the **administration** of medicines to both inward, ETU patients and outdoor patients. |
| **7.14.** | Percentage of patients not storing medicines at home in separate containers with recommended labeling.  **Numerator:** Number of patients who do not store medicines at home in separate containers with recommended labeling.  **Denominator:** Total number of patients studied. | Process | C | Applicable only for the **administration** of medicines to patients residing at home.  The investigator would have to rely on the verbal information provided by the patients. |
| **7.15.** | Percentage of patients not storing medicines in a secured area.  **Numerator:** Numberof patients whose medications were not stored in a locked and a separated area at home. **Denominator:** Total number of patients studied. | Process | C |
| **7.16.** | Percentage of patients admitting taking medicines erroneously within a specified time period (E.g.: three months). **Numerator:** Numberof patients admitting taking medicines erroneously within a specified time period. **Denominator:** Total number of patients studied. | Process | C |
| **7.17.** | Percentage of patients admitting self-medication of prescription only medicines. **Numerator:** Number of patients admitting self-medication of prescription only medicines. **Denominator:** Total number of patients studied. | Process | C | Applicable only for the **administration** of medicines to patients residing at home.  The investigator would have to rely on the verbal information provided by the patients. |
| **08** | **Indicators for Medication Safety in monitoring of medicines** | | | |
| **8.1.** | Number of Medication Errors reported per year | Outcome | C | ---- |
| **8.2.** | Number of Adverse Drug Reactions reported per year | Outcome | C | ---- |
| **8.3.** | Percentageof errors where any preventive actions were taken following reporting.  **Numerator:** Number of errors where preventive actions were taken following reporting.  **Denominator:** Number of medication errors reported. | Outcome | C | ---- |
| **8.4.** | Percentage of adverse drug reactions where causality assessment was performed by the regulatory authority. **Numerator:** Number of adverse drug reactions where causality assessment was performed by the regulatory authority. **Denominator:** Total number of adverse drug reactions reported. | Process | C | ---- |
| **8.5.** | Percentage of medication related admissions.  **Numerator:** Number of medication related admissions**. Denominator:** Total number of admissions to the hospital within the period. | Outcome | C | ---- |
| **8.6.** | Percentage of patients on Lithium, without lithium level being tested within the last 6 months. **Numerator:** Number of patients on Lithium, without lithium level being tested within the last 6 months. **Denominator:** Total number of studied patients on lithium. | Process | C | ---- |
| **8.7.** | Percentage of patients on diuretics without electrolytes being monitored.  **Numerator:** Number of patients on diuretics without electrolytes being monitored.  **Denominator:** Total number of patients on diuretics. | Process | C | Adequacy of monitoring to be determined by the study team. |
| **8.8.** | Percentage of patients on warfarin, without INR being monitored.  **Numerator:** Number of patients on warfarin, without INR being monitored.  **Denominator:** Total number of studied patients on warfarin. | Process | C | Adequacy of monitoring to be determined by the study team. |
| **8.9.** | Percentage of patients on amiodarone, without liver function and thyroid function being monitored. **Numerator:** Number of patients on amiodarone, without liver function and thyroid function being monitored. **Denominator:** Total number of studied patients on amiodarone. | Process | S | Adequacy of monitoring to be determined by the study team. |
| **8.10.** | Percentage of patients on ACE inhibitor or angiotensin II receptor antagonist, without electrolytes and creatinine being measured prior to starting therapy and within 2-4 weeks after starting the therapy. **Numerator:** Number of patients on ACE inhibitor or angiotensin II receptor antagonist, without electrolytes and creatinine being measured prior to starting therapy and within 2-4 weeks after starting the therapy. **Denominator:** Total number of studied patients on ACE inhibitor or angiotensin II receptor antagonist. | Process | S | ---- |
| **8.11.** | Percentage of patients on methotrexate weekly, without full blood count and liver function being monitored within 3 months. **Numerator:** Number of patients on methotrexate weekly, without full blood count and liver function being monitored within 3 months. **Denominator:** Total number of studied patients on methotrexate. | Process | C | ---- |
| **8.12.** | Percentage of patients prescribed an aminoglycoside, without monitoring renal function. **Numerator:** Number of patients prescribed an aminoglycoside, without monitoring renal function.  **Denominator:** Total number of studied patients prescribed an aminoglycoside. | Process | C | Adequacy of monitoring to be determined by the study team. |
| **8.13.** | Percentage of patients with mild renal impairment (CKD Stage 2 / Grade II), prescribed metformin without monitoring renal function.  **Numerator:** Number of patients with mild renal impairment (CKD Stage 2 / Grade II), prescribed metformin without monitoring renal function.  **Denominator:** Total number of studied patients on metformin. | Process | C | Adequacy of monitoring to be determined by the study team. |
